# Supplementary material
Source: publisher figshare collection journal article supplement (https://rs.figshare.com/ndownloader/files/17842616)
Supplement: Supplementary file 1 [file 17842616]

50	0.99	0.99	-1	1	0.03	0.04	0.04	0.1	10	1	79939	0.04533
50	0.99	0.99	-1	1	0.03	0.04	0.04	0.5	10	1	79975	0.046865
50	0.99	0.99	-1	1	0.03	0.04	0.04	0.9	10	1	79809	0.046671
50	0.7	0.6	-1	1	0.03	0.04	0.2	0.1	10	1	1998.2	0.01434
50	0.99	0.99	-1	1	0.03	0.04	0.2	0.5	10	1	79727	0.04395
50	0.99	0.99	-1	1	0.03	0.04	0.2	0.9	10	1	80103	0.044
50	0.01	0.3	-1	1	0.03	0.04	0.8	0.1	10	1	715.59	0.00271
50	0.99	0.8	-1	1	0.03	0.04	0.8	0.5	10	1	2123.8	0.00028
50	0.99	0.9	-1	1	0.03	0.04	0.8	0.9	10	1	7371.3	0.00431
50	0.01	0.2	-1	1	0.03	0.04	1.2	0.1	10	1	626.19	0.00107
50	0.4	0.6	-1	1	0.03	0.04	1.2	0.5	10	1	498.18	0
50	0.99	0.8	-1	1	0.03	0.04	1.2	0.9	10	1	1641	5.00E-05
50	0.01	0.2	-1	1	0.03	0.04	1.6	0.1	10	1	556.05	0.00051
50	0.01	0.4	-1	1	0.03	0.04	1.6	0.5	10	1	399.81	0
50	0.9	0.8	-1	1	0.03	0.04	1.6	0.9	10	1	894.06	0
50	0.01	0.2	-1	1	0.03	0.04	2	0.1	10	1	526.15	0.00024
50	0.01	0.3	-1	1	0.03	0.04	2	0.5	10	1	379.59	0
50	0.6	0.7	-1	1	0.03	0.04	2	0.9	10	1	479.9	0
50	0.01	0.2	-1	1	0.03	0.04	0.4	0	10	1	990.64	0.01964
50	0.01	0.3	-1	1	0.03	0.04	0.4	0.1	10	1	841.37	0.00774
50	0.99	0.7	-1	1	0.03	0.04	0.4	0.2	10	1	2307.8	0.00282
50	0.99	0.8	-1	1	0.03	0.04	0.4	0.3	10	1	4210.2	0.00629
50	0.99	0.8	-1	1	0.03	0.04	0.4	0.4	10	1	4934.9	0.01124
50	0.99	0.9	-1	1	0.03	0.04	0.4	0.5	10	1	10970	0.01721
50	0.99	0.9	-1	1	0.03	0.04	0.4	0.6	10	1	11645	0.02366
50	0.99	0.9	-1	1	0.03	0.04	0.4	0.7	10	1	13349	0.03138
50	0.99	0.99	-1	1	0.03	0.04	0.4	0.8	10	1	76929	0.03865
50	0.99	0.99	-1	1	0.03	0.04	0.4	0.9	10	1	77676	0.03941
